# Supplementary material for: Highly dispersed silver nanoparticles confined in a nitrogen-containing covalent organic framework for 4-nitrophenol reduction
Source: Royal Society of Chemistry journal article supplement (doi:10.1039/d1qm00798j), 2021-01-01
Supplement: d1qm00798j1.pdf [file d1qm00798j1.pdf]

## Supporting Information

### **Highly dispersed silver nanoparticles confined in a nitrogen-containing covalent organic framework for 4-Nitrophenol reduction**

Aoyun Shen<sup>†a</sup>, Ruiqing Luo<sup>†a</sup>, Xinrong Liao<sup>a</sup>, Chiyang He<sup>a</sup>, Yongqiang Li<sup>\*ab</sup>

<sup>a</sup> School of Chemistry and Chemical Engineering, Wuhan Textile University, Hubei  
Key Laboratory of Biomass Fibers and Eco-dyeing & Finishing, Wuhan 430200, P.R.  
China

<sup>b</sup> College of Resources and Environment, Huazhong Agricultural University, Wuhan,  
430070, P.R. China

<sup>†</sup> Equivalent to the first author

<sup>\*</sup> Corresponding author. Tel: +86 027 59367336. Fax: +86 027 59367336. E-mail  
address: 315434174@qq.com

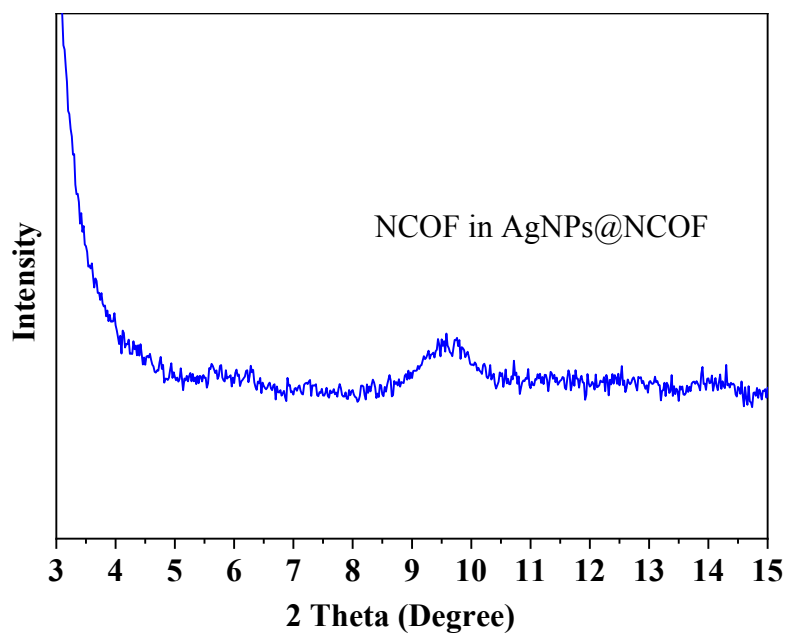

Figure S1. PXRD pattern of the NCOF in AgNPs@NCOF.

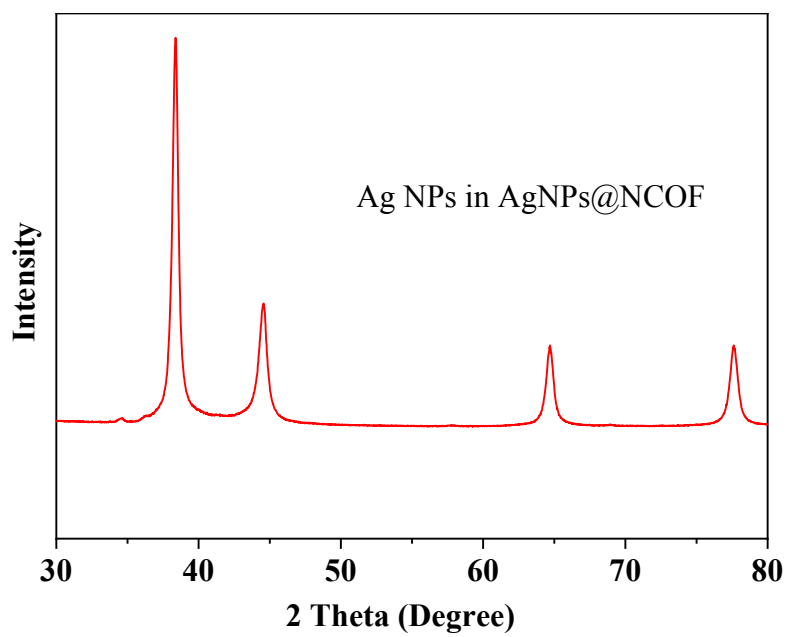

Figure S2. PXRD pattern of the Ag NPs in AgNPs@NCOF.

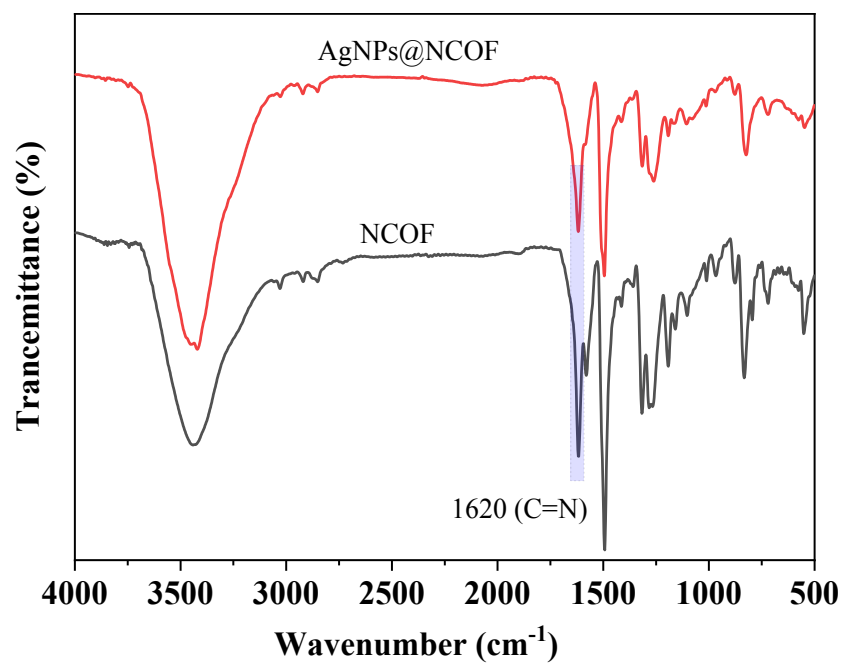

Figure S3. FT-IR spectra of the NCOF and the AgNPs@NCOF.

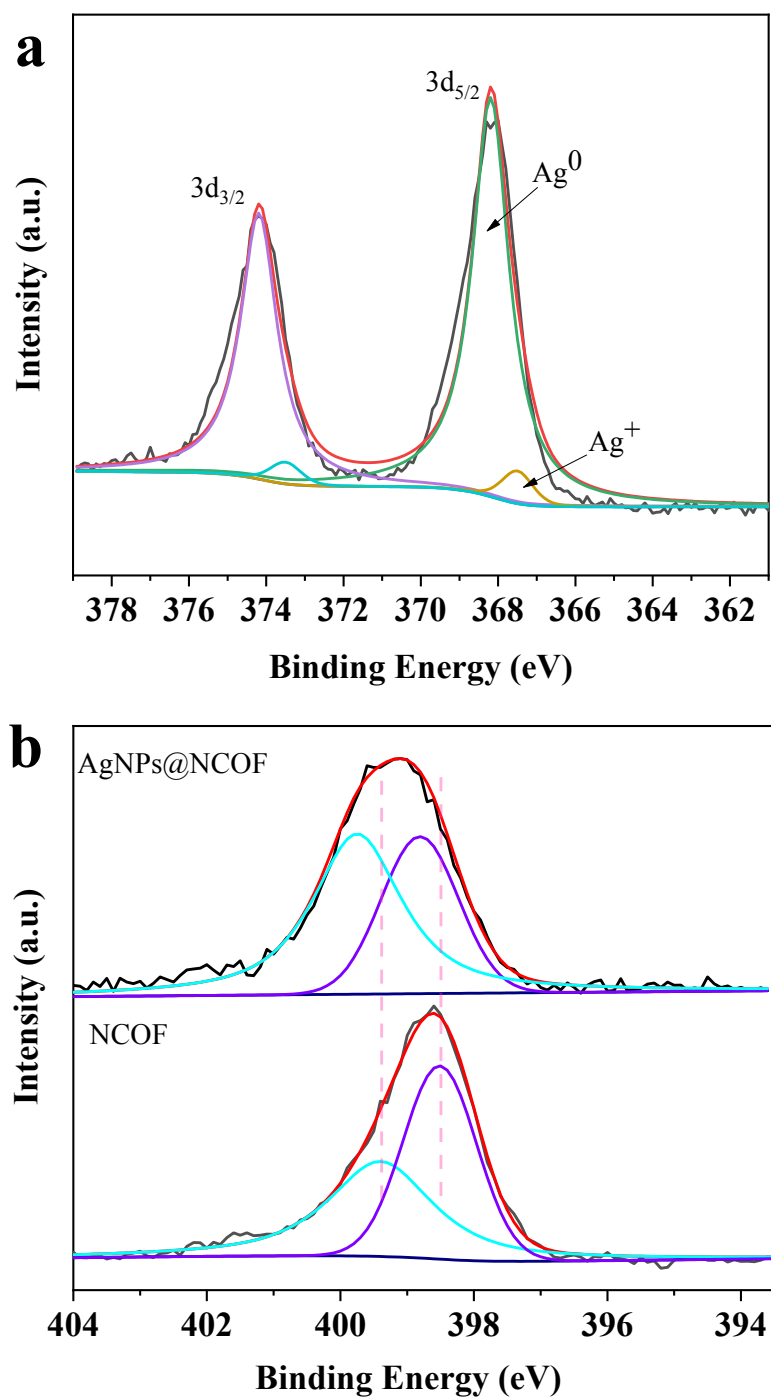

Figure S4. (a) Ag 3d region in the XPS spectra of  $AgNPs@NCOF$ . (b) N 1s region in the XPS spectra of  $AgNPs@NCOF$  and  $NCOF$ .

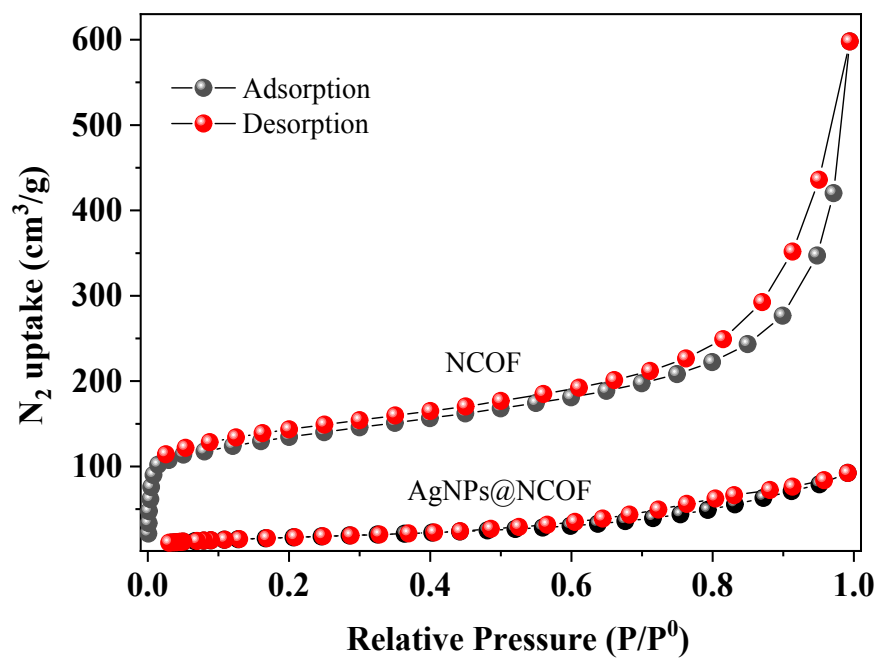

Figure S5. N<sub>2</sub> adsorption-desorption isotherms of AgNPs@NCOF and NCOF.

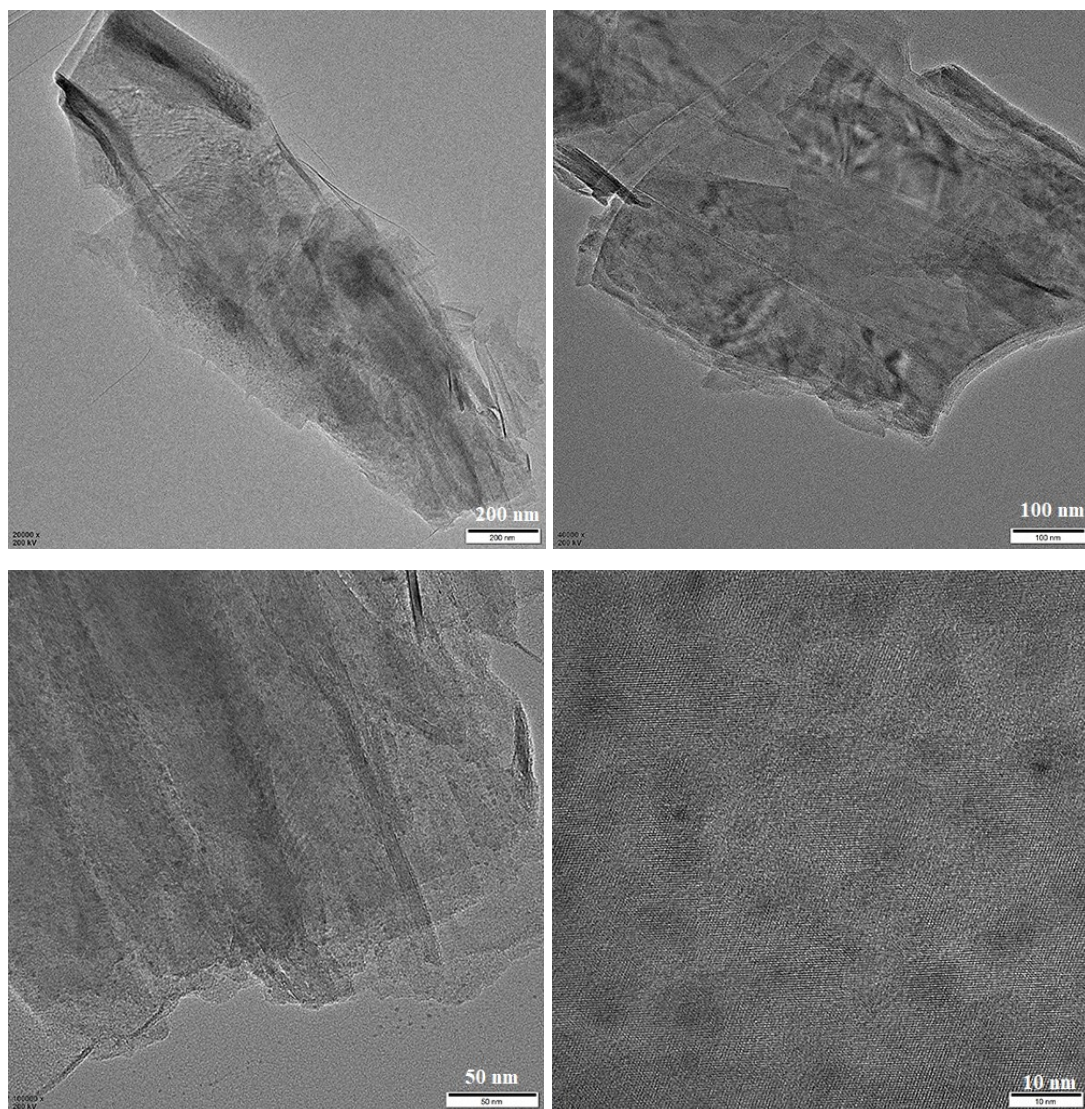

Figure S6. Different magnification TEM image of AgNPs@NCOF.

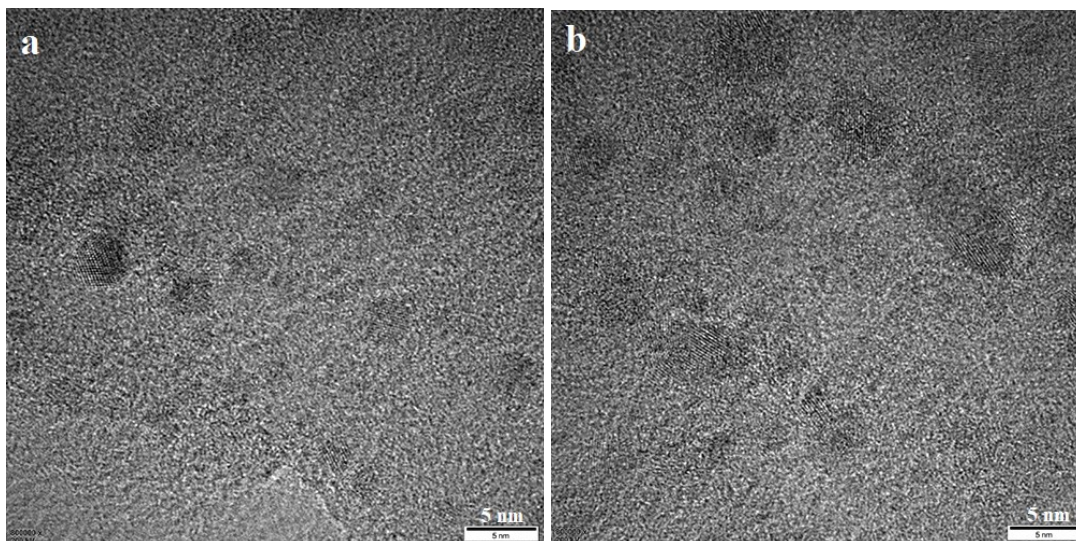

Figure S7. TEM images of AgNPs@NCOF synthesized under different conditions: (a) Ag NPs synthesized using  $\text{NaBH}_4$  methanol solution; (b) Ag NPs synthesized using  $\text{NaBH}_4$  aqueous solution.

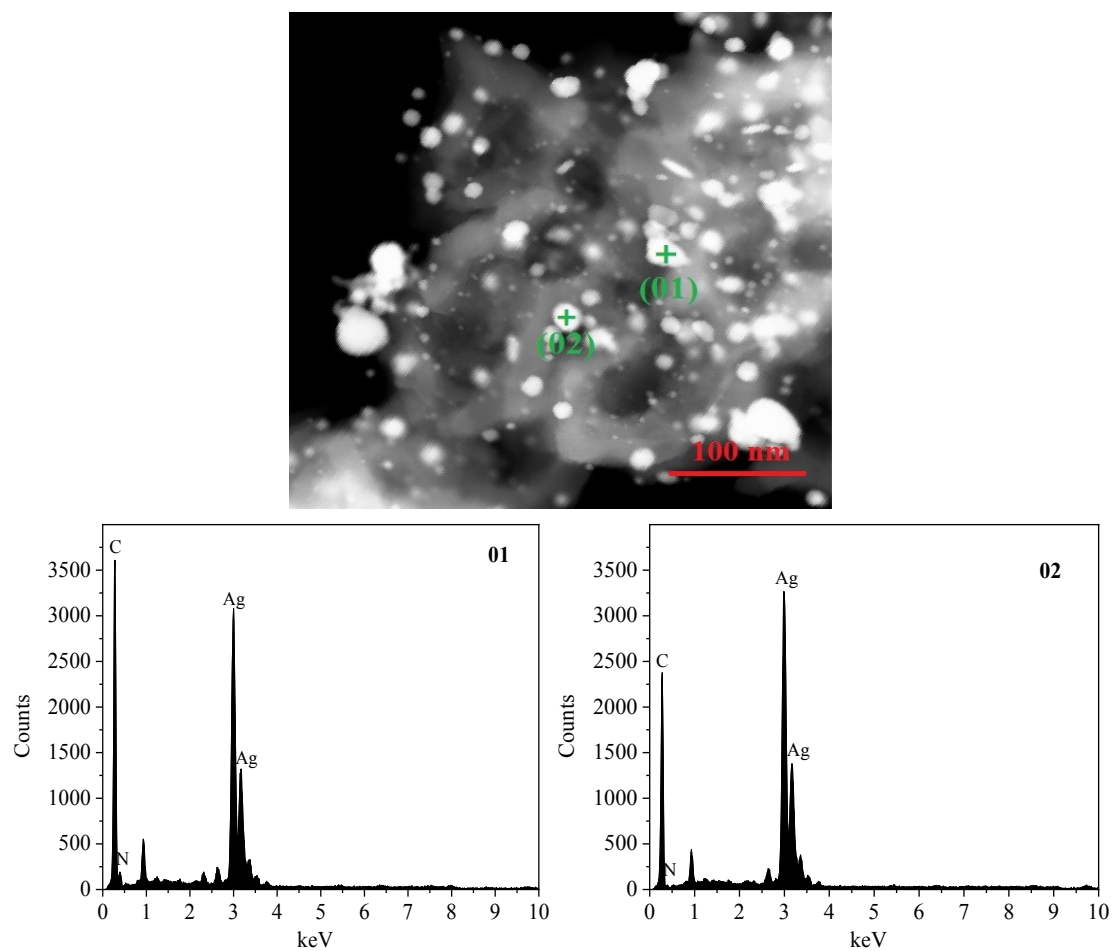

Figure S8. Point mapping of AgNPs@NCOF in two different points to confirm the formation of Ag NPs.

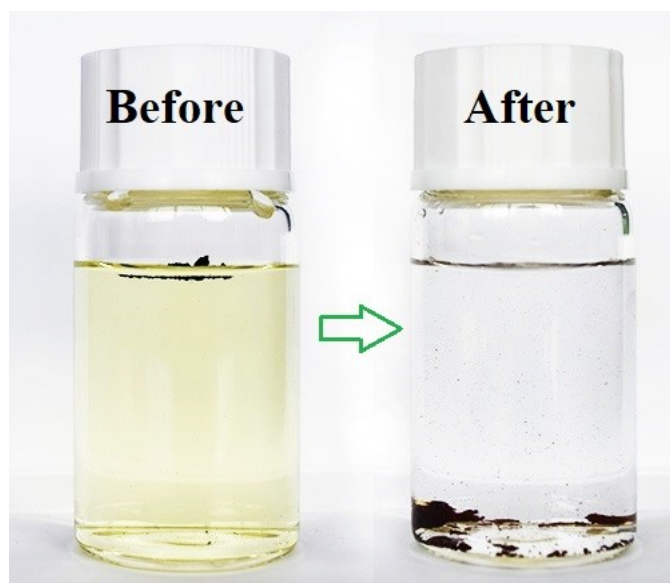

Figure S9. The images of the color change observed for the conversion of 4-nitrophenol to 4-aminophenol after the addition of AgNPs@NCOF catalyst after 3 minutes.

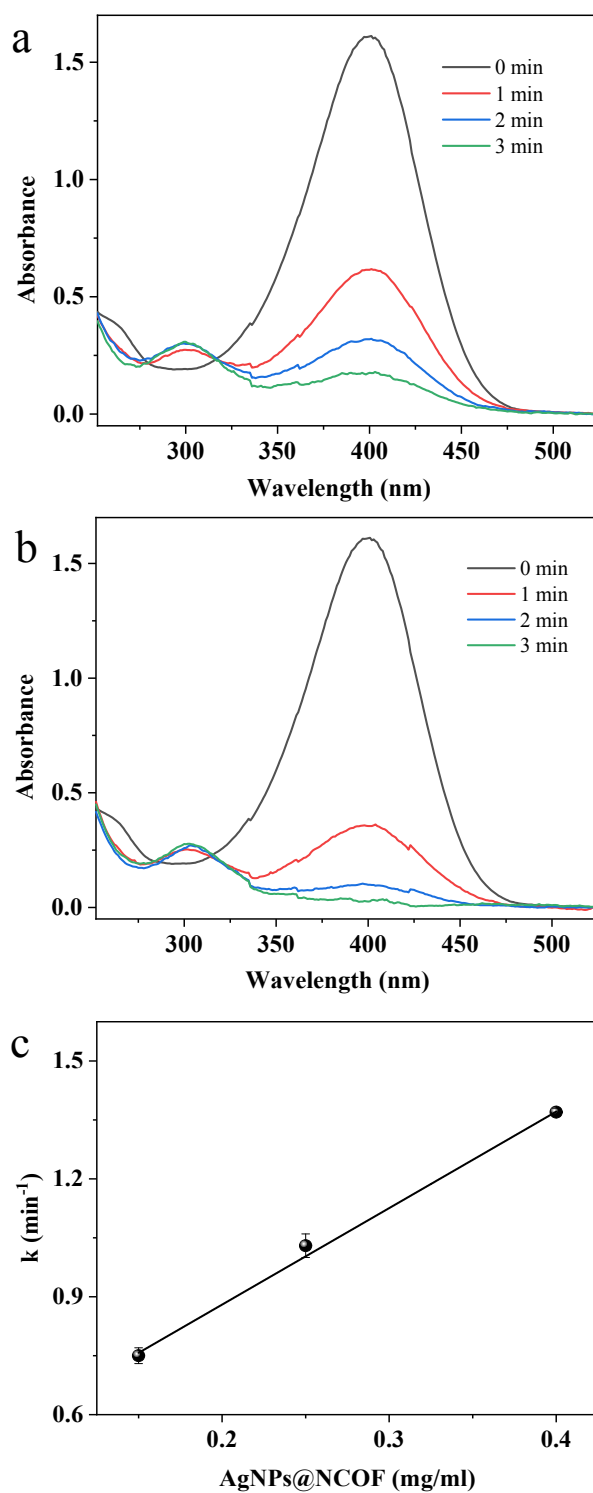

Figure S10. Time-dependent UV-vis spectra of the reduction of 4-NPh catalyzed by AgNPs@NCOF. (a) 0.15 mg/ml and (b) 0.4 mg/ml. (c) The effect of concentration of AgNPs@NCOF on the catalytic performance.

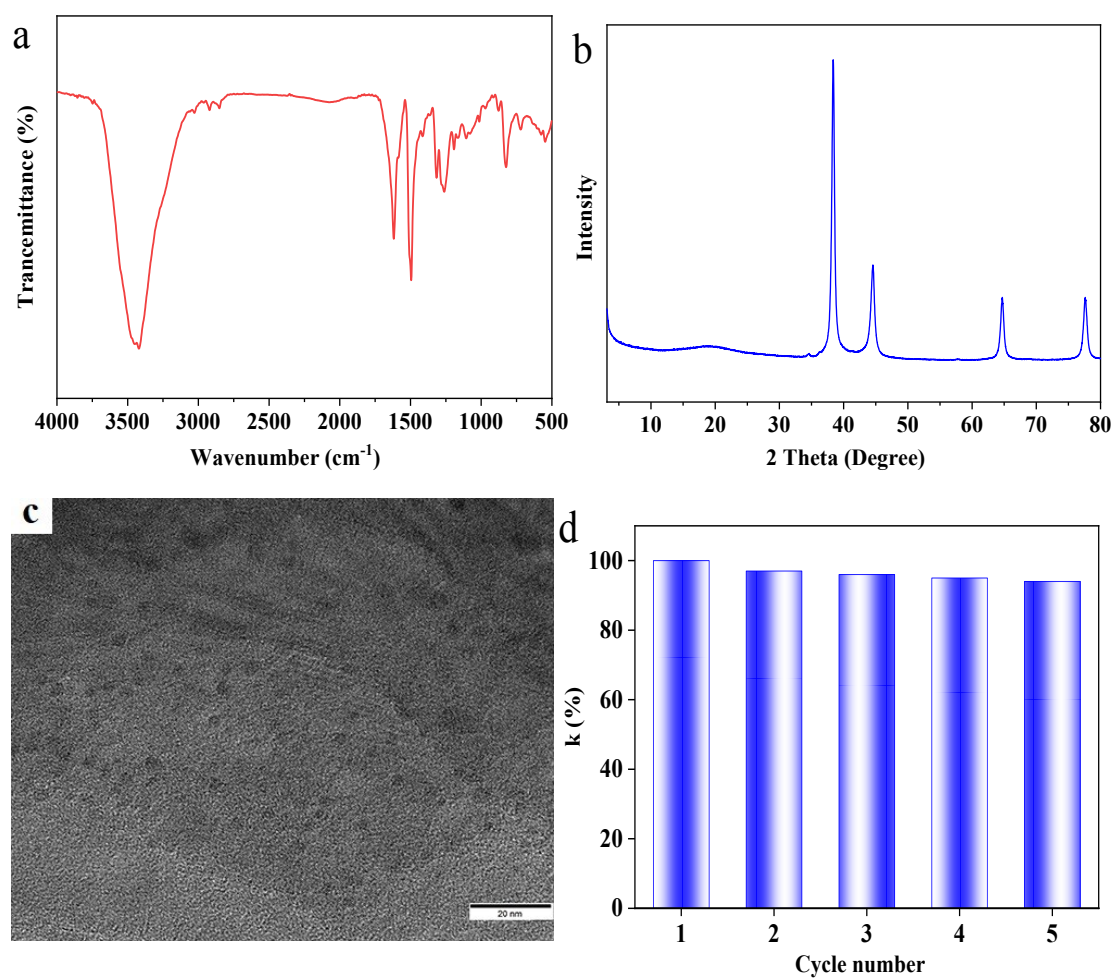

Figure S11. FT-IR spectrum (a), PXRD profile (b) and TEM image of AgNPs@NCOF after five cycles. (d) Recyclability of AgNPs@NCOF in the reduction of 4-NPh.
